# Supplementary material for: Mango Consumption Was Associated with Higher Nutrient Intake and Diet Quality in Women of Childbearing Age and Older Adults
Source: MDPI journal article supplement (doi:10.3390/nu16020303), 2024-01-19
Supplement: s1 [file s1]

Supplementary Table S1. Percentage of older adults who follow vegetarian/vegan diets stratified by mango consumer status<sup>1,2</sup>

| Gender                         | All    |             | Consumers |              | Non-Consumers |             | Consumer vs Non-Consumer | p <sup>4</sup> |
|--------------------------------|--------|-------------|-----------|--------------|---------------|-------------|--------------------------|----------------|
|                                | N      | Mean (SE)   | N         | Mean (SE)    | N             | Mean (SE)   | Beta <sup>3</sup> (SE)   |                |
| Self Identified as Vegetarian  |        |             |           |              |               |             |                          |                |
| All                            | 3,399  | 1.61 (0.25) | 35        | 3.87 (2.90)  | 3,364         | 1.59 (0.26) | 2.28 (2.96)              | 0.4467         |
| Male                           | 1,694  | 1.08 (0.23) | 13        | 1.98 (2.82)  | 1,681         | 1.08 (0.23) | 0.90 (2.79)              | 0.7496         |
| Female                         | 1,705  | 2.04 (0.42) | 22        | 5.11 (3.84)  | 1,683         | 2.00 (0.43) | 3.11 (3.98)              | 0.4407         |
| Subjects with Zero Meat Intake |        |             |           |              |               |             |                          |                |
| All                            | 18,784 | 6.91 (0.29) | 225       | 15.36 (4.29) | 18,559        | 6.83 (0.29) | 8.53 (4.31)              | <b>0.0493</b>  |
| Male                           | 9,371  | 5.29 (0.36) | 98        | 8.66 (4.34)  | 9,273         | 5.27 (0.37) | 3.39 (4.40)              | 0.4418         |
| Female                         | 9,413  | 8.23 (0.41) | 127       | 20.24 (5.54) | 9,286         | 8.11 (0.40) | 12.14 (5.54)             | <b>0.0297</b>  |

Data source: NHANES 1988-1994, 1999-2018; subjects age 60 years of age and older (n=18,784) with complete and reliable 24-hr dietary recalls. <sup>1</sup>Data were adjusted for age, gender, ethnicity, physical activity level, poverty income ratio, weight status, and current smoking status. <sup>2</sup>Mango consumers were defined as subjects who reported raw mango on either day 1 or day 2 24-hour recalls. <sup>3</sup>Beta is a regression coefficient indicating differences between consumer and non-consumer. <sup>4</sup>p values are for difference between consumer and non-consumer intake. Bold values designate significant differences at p<0.05. y: years of age; SE: standard error.
